# Supplementary material for: Compensation for Reflectance Variation in Vessel Density Quantification by Optical Coherence Tomography Angiography
Source: PubMed Central journal article supplement (PMC5015963; doi:10.1167/iovs.16-20080), 2016-08-29

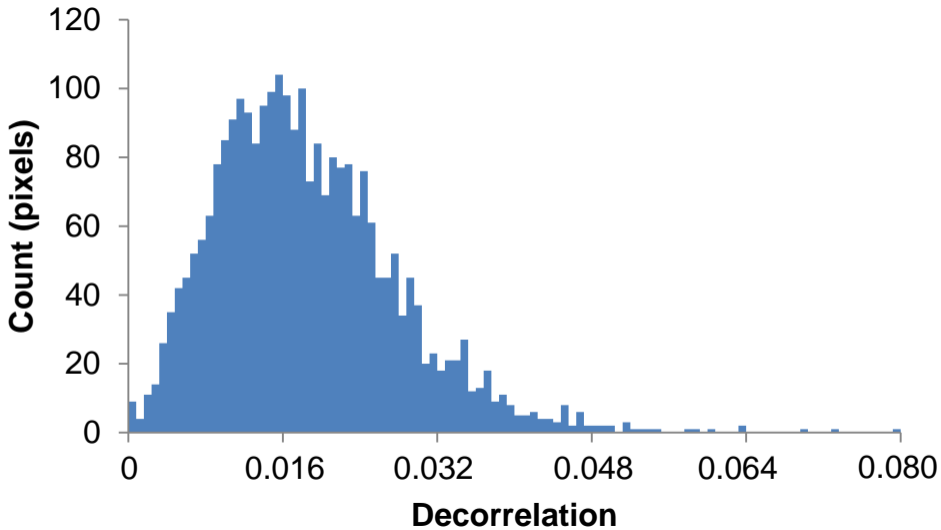

Supplement: i1552-5783-57-10-4485-s01.pdf [file i1552-5783-57-10-4485-s01.pdf]
