# Supplementary material for: Compensation for Reflectance Variation in Vessel Density Quantification by Optical Coherence Tomography Angiography
Source: PubMed Central journal article supplement (PMC5015963; doi:10.1167/iovs.16-20080), 2016-08-29
Supplement: i1552-5783-57-10-4485-s02.pdf [file i1552-5783-57-10-4485-s02.pdf]

## **SUPPLEMENTARY FIGURE LEGENDS**

**SUPPLEMENTARY FIGURE.** Histogram of the decorrelation values of FAZ pixels within *en face* angiograms.
